# Supplementary material for: Low levels of population genetic structure in the gilthead sea bream, Sparus aurata, along the coast of Italy
Source: Oxford University Press journal article supplement (doi:10.1093/icesjms/fsr175), 2011-11-13
Supplement: fsr175supp.doc [file fsr175supp.doc]

**Supplementary material: ICES Journal of Marine Science, 69**

**Low levels of population genetic structure in the gilthead seabream, *Sparus aurata*,along the coast of Italy**

Paolo Franchini, Luciana Sola, Donatella Crosetti, Valentina Milana, and Anna Rita Rossi

**Table S1**. Allele frequencies, observed (*H*o) and expected (*H*e) heterozygosities, and number of alleles (*n*) for the ten microsatellite loci for each population. Sample size is in parenthesis. *H*o and *H*e values are emboldened when there is deviation from H–W expectation on that population/locus (tablewide Bonferroni corrected level *α* = 0.0003). Private alleles and their corresponding frequencies are emboldened. Observed (*H*o overall) and expected (*H*e overall) heterozygosities are calculated over all loci, total number of private alleles (NPA), proportion of private alleles per locus (PPA), and mean number of alleles per locus (MNA) for each population are listed at the bottom. Sampling localities are abbreviated in line with Table 1.

|  |  | **Population** | | | | | | | | | | | | | | |
| --- | --- | --- | --- | --- | --- | --- | --- | --- | --- | --- | --- | --- | --- | --- | --- | --- |
| **Locus** | **Allele** | **At-A**  **(48)** | **Ad-U**  **(48)** | **Ad-L1**  **(48)** | **Ad-L2**  **(39)** | **Ad-L3**  **(31)** | **Ad-B**  **(62)** | **Sy-T**  **(42)** | **Ty-B**  **(30)** | **Ty-S**  **(32)** | **Ty-Z**  **(48)** | **Li-G**  **(40)** | **Ty-T**  **(48)** | **Sa-M**  **(32)** | **SC-G**  **(32)** | **SS-C**  **(48)** |
| *Pb-Ovi-D106* | 310 | - | 3.41 | 1.04 | - | - | - | - | 1.72 | 1.56 | 1.04 | 2.50 | 1.06 | 3.33 | - | 1.04 |
|  | 314 | 2.17 | 2.27 | 1.04 | 3.85 | 6.45 | 3.23 | 2.44 | 1.72 | 4.69 | 1.04 | 3.75 | 4.26 | 6.67 | - | 2.08 |
|  | 318 | 3.26 | 4.55 | 2.08 | 6.41 | 3.23 | 3.23 | 9.76 | 5.17 | 7.81 | 5.21 | 10.00 | 4.26 | 5.00 | 6.25 | 6.25 |
|  | 322 | - | 1.14 | - | - | - | - | - | - | 1.56 | - | - | - | - | - | 1.04 |
|  | 325 | 25.00 | 13.64 | 33.33 | 14.10 | 24.19 | 9.68 | 15.85 | 8.62 | 3.13 | 7.29 | 7.50 | 3.19 | 8.33 | 22.92 | 9.38 |
|  | 326 | 2.17 | 1.14 | 2.08 | 1.28 | 3.23 | - | - | - | - | 1.04 | 1.25 | 3.19 | - | - | 1.04 |
|  | 329 | 3.26 | 7.95 | 5.21 | 7.69 | - | 9.68 | 8.54 | 5.17 | 7.81 | 10.42 | 6.25 | 6.38 | 6.67 | 14.58 | 2.08 |
|  | 330 | 4.35 | 1.14 | - | 6.41 | 1.61 | - | 2.44 | 1.72 | 3.13 | 1.04 | 1.25 | 1.06 | - | 2.08 | 1.04 |
|  | 333 | - | - | - | - | - | - | - | - | - | 2.08 | - | - | - | - | 1.04 |
|  | 334 | - | - | - | - | - | **1.61** | - | - | - | - | - | - | - | - | - |
|  | 337 | 3.26 | 14.77 | 6.25 | 5.13 | 1.61 | 6.45 | 7.32 | 17.24 | 17.19 | 5.21 | 12.50 | 7.45 | 15.00 | 2.08 | 9.38 |
|  | 341 | 20.65 | 11.36 | 15.63 | 17.95 | 25.81 | 18.55 | 21.95 | 18.97 | 14.06 | 22.92 | 7.50 | 15.96 | 10.00 | 6.25 | 25.00 |
|  | 345 | 14.13 | 5.68 | 5.21 | 6.41 | 4.84 | 4.84 | 3.66 | 3.45 | 7.81 | 6.25 | 6.25 | 8.51 | 6.67 | 6.25 | 2.08 |
|  | 349 | 2.17 | 5.68 | 10.42 | 5.13 | 11.29 | 14.52 | 12.20 | 12.07 | 10.94 | 11.46 | 18.75 | 10.64 | 13.33 | 22.92 | 10.42 |
|  | 353 | 9.78 | 14.77 | 3.13 | 6.41 | 3.23 | 4.84 | 6.10 | 12.07 | 9.38 | 10.42 | 15.00 | 11.70 | 5.00 | - | 7.29 |
|  | 357 | 1.09 | - | 1.04 | 1.28 | - | 3.23 | - | 3.45 | 3.13 | 1.04 | 1.25 | - | 1.67 | - | 1.04 |
|  | 361 | 1.09 | 1.14 | 1.04 | - | - | 0.81 | 1.22 | 1.72 | 1.56 | 1.04 | - | 1.06 | 1.67 | - | - |
|  | 365 | 1.09 | 2.27 | 1.04 | - | - | 3.23 | - | - | - | - | - | - | 1.67 | - | 1.04 |
|  | 369 | 1.09 | 1.14 | 1.04 | 3.85 | 1.61 | - | 1.22 | 1.72 | - | 1.04 | - | - | 3.33 | - | 2.08 |
|  | 373 | 1.09 | 2.27 | 2.08 | 2.56 | 1.61 | 2.42 | 1.22 | 1.72 | - | 2.08 | 1.25 | 2.13 | - | 4.17 | 3.13 |
|  | 377 | 2.17 | 1.14 | 4.17 | 5.13 | 4.84 | 8.06 | 3.66 | 1.72 | 1.56 | 6.25 | 1.25 | 7.45 | 1.67 | - | 5.21 |
|  | 381 | 2.17 | 2.27 | 3.13 | 3.85 | 4.84 | - | 1.22 |  | 1.56 | - | - | 6.38 | 6.67 | 10.42 | - |
|  | 385 | - | 1.14 | 1.04 | 1.28 | - | 0.81 | - | 1.72 | 1.56 | 1.04 | 2.50 | 2.13 | 3.33 | - | 3.13 |
|  | 389 | - | 1.14 | - | 1.28 | 1.61 | - | - | - |  | 1.04 | - | 2.13 | - | 2.08 | 2.08 |
|  | 393 | - | - | - | - | - | 2.42 | - | - | 1.56 | 1.04 | 1.25 | - | - | - | 1.04 |
|  | 397 | - | - | - | - | - | - | - | - | - | - | - | **1.06** | - | - | - |
|  | 401 | - | - | - | - | - | 2.42 | - | - | - | - | - | - | - | - | 2.08 |
|  | 417 | - | - | - | - | - | - | **1.22** | - | - | - | - | - | - | - | - |
| *H*e |  | 0.866 | 0.916 | 0.847 | 0.923 | 0.860 | **0.911** | 0.892 | 0.903 | 0.919 | 0.901 | 0.905 | 0.925 | 0.931 | 0.866 | 0.901 |
| *H*o |  | 0.761 | 0.932 | 0.813 | 0.897 | 0.839 | **0.839** | 0.756 | 0.931 | 0.875 | 0.917 | 0.875 | 0.957 | 1.000 | 0.958 | 0.854 |
| *n* | 28 | 18 | 21 | 19 | 18 | 15 | 18 | 16 | 17 | 18 | 21 | 17 | 19 | 17 | 11 | 23 |
|  |  |  |  |  |  |  |  |  |  |  |  |  |  |  |  |  |
| *SauK140* | 125 | - | - | - | - | - | - | - | - | - | **1.04** | - | - | - | - | - |
|  | 127 | - | 1.06 | 1.11 | - | - | - | - | 1.67 | 1.61 | 1.04 | 1.25 | - | - | - | - |
|  | 129 | - | - | - | - | - | - | - | - | **1.61** | - | - | - | - | - | - |
|  | 133 | 1.04 | - | - | - | - | - | - | 3.33 | - | - | 2.50 | - | 1.56 | - | - |
|  | 135 | 13.54 | 20.21 | 12.22 | 19.23 | 13.79 | 10.66 | 25.00 | 13.33 | 9.68 | 14.58 | 16.25 | 8.33 | 18.75 | 17.19 | 14.58 |
|  | 137 | 4.17 | 7.45 | 5.56 | 2.56 | 5.17 | 1.64 | 3.57 | 5.00 | 6.45 | 7.29 | 5.00 | 5.21 | 1.56 | 4.69 | 8.33 |
|  | 139 | 27.08 | 24.47 | 31.11 | 38.46 | 31.03 | 24.59 | 25.00 | 26.67 | 19.35 | 29.17 | 20.00 | 27.08 | 23.44 | 31.25 | 19.79 |
|  | 141 | 9.38 | 14.89 | 10.00 | 19.23 | 10.34 | 17.21 | 20.24 | 16.67 | 17.74 | 10.42 | 16.25 | 21.88 | 15.63 | 26.56 | 19.79 |
|  | 143 | 4.17 | 8.51 | 8.89 | 1.28 | 10.34 | 11.48 | 5.95 | 10.00 | 9.68 | 9.38 | 7.50 | 4.17 | 9.38 | 9.38 | 5.21 |
|  | 145 | 15.63 | 3.19 | 5.56 | 2.56 | 8.62 | 14.75 | 4.76 | 13.33 | 11.29 | 4.17 | 7.50 | 4.17 | 12.50 | 6.25 | 4.17 |
|  | 147 | 3.13 | 3.19 | 2.22 | 1.28 | - | 2.46 | - | - | 1.61 | 3.13 | - | 6.25 | 1.56 | - | 4.17 |
|  | 149 | - | - | - | - | 1.72 | - | - | - | - | - | - | - | - | - | 3.13 |
|  | 151 | 18.75 | 14.89 | 17.78 | 11.54 | 15.52 | 14.75 | 9.52 | 10.00 | 17.74 | 14.58 | 17.50 | 17.71 | 6.25 | 4.69 | 13.54 |
|  | 153 | - | - | - | - | - | - | 2.38 | - | - | 1.04 | 1.25 | 2.08 | - | - | 1.04 |
|  | 155 | 3.13 | 2.13 | 4.44 | 3.85 | 3.45 | 1.64 | 2.38 | - | - | 4.17 | 3.75 | 3.13 | 7.81 | - | 5.21 |
|  | 157 | - | - | 1.11 | - | - | 0.82 | - | - | 3.23 | - | 1.25 | - | - | - | - |
|  | 163 | - | - | - | - | - | - | 1.19 | - | - | - | - | - | 1.56 | - | 1.04 |
| *H*e |  | 0.843 | 0.849 | 0.839 | 0.772 | 0.842 | 0.848 | 0.826 | 0.856 | 0.876 | 0.852 | 0.871 | 0.838 | 0.864 | 0.798 | 0.874 |
| *H*o |  | 0.896 | 0.872 | 0.822 | 0.795 | 0.897 | 0.803 | 0.810 | 0.833 | 0.903 | 0.792 | 0.825 | 0.833 | 0.844 | 0.844 | 0.875 |
| *n* | 17 | 10 | 10 | 11 | 9 | 9 | 10 | 10 | 9 | 11 | 12 | 12 | 10 | 11 | 7 | 12 |
|  |  |  |  |  |  |  |  |  |  |  |  |  |  |  |  |  |
| *SaUG46* | 180 | 36.17 | 35.42 | 33.70 | 34.62 | 30.00 | 36.07 | 39.29 | 30.00 | 37.50 | 28.72 | 27.50 | 35.42 | 37.50 | 39.29 | 42.71 |
|  | 182 | 9.57 | 19.79 | 17.39 | 15.38 | 33.33 | 20.49 | 21.43 | 26.67 | 15.63 | 22.34 | 16.25 | 21.88 | 20.31 | 28.57 | 19.79 |
|  | 185 | - | 1.04 | 1.09 | 2.56 | 5.00 | 5.74 | - | 1.67 | 1.56 | 3.19 | 1.25 | 1.04 | 3.13 | - | - |
|  | 187 | - | 9.38 | 6.52 | 10.26 | 1.67 | 8.20 | 8.33 | 6.67 | 3.13 | 7.45 | 11.25 | 9.38 | 7.81 | 8.93 | 7.29 |
|  | 189 | 4.26 | 6.25 | 3.26 | 6.41 | 1.67 | 3.28 | 4.76 | 5.00 | 4.69 | 7.45 | 2.50 | 2.08 | 1.56 | - | 8.33 |
|  | 191 | 3.19 | 2.08 | 4.35 | 2.56 | 1.67 | 4.92 | 3.57 | 3.33 | 3.13 | 3.19 | 3.75 | 1.04 | 3.13 | 3.57 | 4.17 |
|  | 193 | 13.83 | 4.17 | 4.35 | 12.82 | 8.33 | 6.56 | 7.14 | 6.67 | 6.25 | 4.26 | 12.50 | 2.08 | 7.81 | 1.79 | 4.17 |
|  | 195 | 19.15 | 14.58 | 11.96 | 12.82 | 10.00 | 9.84 | 11.90 | 13.33 | 26.56 | 13.83 | 17.50 | 18.75 | 14.06 | 12.50 | 6.25 |
|  | 197 | 10.64 | 3.13 | 6.52 | - | 1.67 | 0.82 | 1.19 | 1.67 | 1.56 | 6.38 | - | 2.08 | 1.56 | 1.79 | 4.17 |
|  | 199 | 2.13 | 1.04 | 3.26 | - | 5.00 | 1.64 | - | 3.33 | - | 2.13 | 1.25 | 3.13 | 1.56 | 1.79 | - |
|  | 201 | - | 1.04 | 1.09 | - | 1.67 | - | 2.38 | 1.67 | - | - | - | 2.08 | 1.56 | 1.79 | 1.04 |
|  | 203 | 1.06 | 2.08 | 6.52 | 1.28 | - | 1.64 | - | - | - | 1.06 | 1.25 | 1.04 | - | - | 2.08 |
|  | 205 | - | - | - | 1.28 | - | 0.82 | - | - | - | - | 5.00 | - | - | - | - |
| *H*e |  | 0.798 | 0.806 | 0.832 | 0.818 | 0.789 | 0.806 | 0.779 | 0.820 | 0.768 | 0.838 | 0.845 | 0.788 | 0.796 | 0.751 | 0.764 |
| *H*o |  | 0.872 | 0.854 | 0.848 | 0.846 | 0.867 | 0.918 | 0.762 | 0.767 | 0.781 | 0.809 | 0.925 | 0.813 | 0.781 | 0.893 | 0.792 |
| *n* | 13 | 9 | 12 | 12 | 10 | 11 | 12 | 9 | 11 | 9 | 11 | 11 | 12 | 11 | 9 | 10 |
|  |  |  |  |  |  |  |  |  |  |  |  |  |  |  |  |  |
| *PbOviD102* | 140 | - | - | - | - | - | **0.81** | - | - | - | - | - | - | - | - | - |
|  | 144 | - | - | - | - | - | **0.81** | - | - | - | - | - | - | - | - | - |
|  | 152 | - | 1.04 | 3.13 | 1.28 | - | 3.23 | - | - | - | - | - | 2.08 | - | - | - |
|  | 156 | 1.04 | 2.08 | 2.08 | 1.28 | 3.33 | 5.65 | - | - | 4.69 | 2.08 | - | 3.13 | 4.84 | 2.38 | - |
|  | 160 | - | 2.08 | 2.08 | - | - | - | - | - | - | - | - | 2.08 | - | - | - |
|  | 164 | - | - | - | 1.28 | - | - | - | - | - | 1.04 | - | - | - | - | - |
|  | 168 | - | - | - | - | - | **0.81** | - | - | - | - | - | - | - | - | - |
|  | 172 | - | 1.04 | - | - | - | - | 1.19 |  | 1.56 | 1.04 | - | - | - | - | 1.04 |
|  | 176 | 3.13 | - | 3.13 | 3.85 | 5.00 | 1.61 | - | - | - | - | - | 1.04 | - | 4.76 | - |
|  | 180 | 2.08 | 2.08 | 10.42 | 3.85 | 16.67 | 3.23 | 5.95 | 3.45 | 1.56 | 2.08 | 1.39 | 3.13 | 3.23 | - | 1.04 |
|  | 184 | 7.29 | 7.29 | 8.33 | 6.41 | 5.00 | 5.65 | 8.33 | 3.45 | 3.13 | 9.38 | 5.56 | 13.54 | 3.23 | 9.52 | 8.33 |
|  | 188 | 3.13 | 5.21 | 6.25 | 8.97 | 1.67 | 6.45 | 7.14 | 12.07 | 4.69 | 11.46 | 8.33 | 3.13 | 12.90 | 4.76 | 13.54 |
|  | 192 | 2.08 | 9.38 | 6.25 | 3.85 | 5.00 | 4.03 | 7.14 | 3.45 | 1.56 | 3.13 | 11.11 | 7.29 | 1.61 | 4.76 | 6.25 |
|  | 196 | 5.21 | 4.17 | 8.33 | 6.41 | 3.33 | 6.45 | 3.57 | 5.17 | 7.81 | 7.29 | 5.56 | 6.25 | 9.68 | 4.76 | 11.46 |
|  | 200 | 9.38 | 10.42 | 4.17 | 7.69 | 1.67 | 4.03 | 4.76 | 10.34 | 12.50 | 7.29 | 4.17 | 4.17 | 6.45 | 4.76 | 5.21 |
|  | 204 | 7.29 | 12.50 | 7.29 | 7.69 | 15.00 | 2.42 | 4.76 | 8.62 | 7.81 | 6.25 | 2.78 | 7.29 | 8.06 | 4.76 | 6.25 |
|  | 208 | 13.54 | 8.33 | 6.25 | 10.26 | 13.33 | 4.03 | 8.33 | 10.34 | 9.38 | 6.25 | 6.94 | 11.46 | 8.06 | 9.52 | 4.17 |
|  | 212 | 8.33 | 8.33 | 4.17 | 3.85 | 5.00 | 8.87 | 4.76 | 8.62 | 6.25 | 7.29 | 9.72 | 6.25 | 4.84 | 4.76 | 5.21 |
|  | 216 | 14.58 | 5.21 | 3.13 | 7.69 | 8.33 | 5.65 | 3.57 | 3.45 | 3.13 | 4.17 | 8.33 | 3.13 | 8.06 | 9.52 | 5.21 |
|  | 220 | 8.33 | 5.21 | 2.08 | 3.85 | 1.67 | 3.23 | 11.90 | 5.17 | 6.25 | 11.46 | 11.11 | 5.21 | 6.45 | 11.90 | 8.33 |
|  | 224 | 4.17 | 5.21 | 5.21 | 1.28 | 3.33 | 8.87 | 7.14 | 5.17 | 7.81 | 6.25 | 4.17 | 3.13 | 4.84 | 7.14 | 3.13 |
|  | 228 | 3.13 | 3.13 | 4.17 | 5.13 | 3.33 | 2.42 | 4.76 | 8.62 | 9.38 | 2.08 | 6.94 | 5.21 | 1.61 | 2.38 | 4.17 |
|  | 232 | 2.08 | 2.08 | 4.17 | 5.13 | 3.33 | 6.45 | 2.38 | 5.17 | 4.69 | 3.13 | 5.56 | 5.21 | 8.06 | - | 5.21 |
|  | 236 | 2.08 | 1.04 | 1.04 | 3.85 | - | 3.23 | 3.57 | 5.17 | 4.69 | 1.04 | 2.78 | 3.13 | 3.23 | - | 6.25 |
|  | 240 | 1.04 | 1.04 | 1.04 | 1.28 | - | 4.03 | 3.57 | - | 3.13 | 3.13 | 1.39 | 1.04 | 1.61 | 4.76 | - |
|  | 244 | - | - | - | 1.28 | - | 4.84 | 2.38 | - | - | - | - | - | - | - | 1.04 |
|  | 248 | 1.04 | 2.08 | 2.08 | 1.28 | - | 0.81 | 1.19 | 1.72 | - | 1.04 |  | 2.08 | 1.61 | 4.76 |  |
|  | 252 | - | 1.04 | 3.13 | - | 1.67 | 2.42 | - | - | - | 1.04 | - | - | - | 2.38 | 2.08 |
|  | 256 | - | - | - | - | - | - | - | - | - | **1.04** | - | - | - | - | - |
|  | 260 | - | - | 1.04 | - | 1.67 | - | 1.19 | - | - | 1.04 | - | 1.04 | - | 2.38 | - |
|  | 264 | - | - | - | **1.28** | - | - | - | - | - | - | - | - | - | - | - |
|  | 268 | - | - | - | 1.28 | 1.67 | - | - | - | - | - | - | - | - | - | - |
|  | 272 | - | - | - | - | - | - | - | - | - | - | 1.39 | - | 1.61 | - | - |
|  | 276 | - | - | - | - | - | - | - | - | - | - | 1.39 | - | - | - | 1.04 |
|  | 284 | **1.04** | - | - | - | - | - | - | - | - | - | - | - | - | - | - |
|  | 332 | - | - | 1.04 | - | - | - | 2.38 | - | - | - | - | - | - | - | 1.04 |
|  | 360 | - | - |  | - | - | - | - | - | - | - | **1.39** | - | - | - | - |
| *H*e |  | 0.927 | 0.939 | 0.952 | 0.952 | 0.923 | 0.955 | 0.948 | 0.940 | 0.943 | 0.940 | 0.940 | 0.943 | 0.943 | 0.954 | 0.936 |
| *H*o |  | 0.979 | 0.938 | 0.979 | 0.974 | 0.967 | 0.952 | 0.976 | 0.897 | 0.938 | 0.958 | 0.889 | 0.958 | 0.968 | 1.000 | 0.917 |
| *n* | 37 | 20 | 22 | 26 | 24 | 19 | 25 | 21 | 16 | 18 | 23 | 19 | 22 | 19 | 18 | 20 |
|  |  |  |  |  |  |  |  |  |  |  |  |  |  |  |  |  |
| *PbOviB2* | 63 | - | - | - | - | - | - | - | - | - | - | - | - | - | 1.67 | 1.06 |
|  | 65 | - | - | - | - | - | - | - | - | - | - | - | - | 1.56 | - | 1.06 |
|  | 67 | 2.08 | - | 1.06 | - | - | - | - | - | - | - | - | - | - | - | - |
|  | 69 | 43.75 | 6.38 | 3.19 | - | 3.33 | 18.85 | 29.27 | - | - | - | 10.00 | - | - | 16.67 | - |
|  | 71 | 16.67 | 48.94 | 39.36 | 34.62 | 38.33 | 38.52 | 30.49 | 48.28 | 48.44 | 42.71 | 37.50 | 41.67 | 50.00 | 30.00 | 43.62 |
|  | 73 | 7.29 | 15.96 | 25.53 | 26.92 | 26.67 | 21.31 | 3.66 | 18.97 | 28.13 | 26.04 | 18.75 | 30.21 | 25.00 | 28.33 | 20.21 |
|  | 75 | 7.29 | 9.57 | 10.64 | 12.82 | 10.00 | 11.48 | 4.88 | 1.72 | 3.13 | 12.50 | 3.75 | 8.33 | 4.69 | 3.33 | 8.51 |
|  | 77 | - | 4.26 | 6.38 | 5.13 | 6.67 | 5.74 | 1.22 | 1.72 | 6.25 | 2.08 | 7.50 | 5.21 | 3.13 | 3.33 | 2.13 |
|  | 79 | 11.46 | 3.19 | - | 2.56 | - | - | 14.63 | 3.45 | 1.56 | - | 3.75 | 2.08 | 3.13 | 3.33 | 4.26 |
|  | 81 | 3.13 | 3.19 | 6.38 | 5.13 | - | 1.64 | 2.44 | 5.17 | 3.13 | 6.25 | 7.50 | 5.21 | 6.25 | 3.33 | 9.57 |
|  | 83 | 1.04 | 2.13 | 3.19 | - | 3.33 | 1.64 | 2.44 | 5.17 | 4.69 | 2.08 | 7.50 | - | 1.56 | 1.67 | 3.19 |
|  | 85 | 7.29 | 3.19 | - | 6.41 | 5.00 | 0.82 | 2.44 | 6.90 | 3.13 | 1.04 | - | - | - | 1.67 | 2.13 |
|  | 87 | - | 3.19 | 4.26 | 5.13 | 5.00 | - | - | - | 1.56 | 3.13 | 1.25 | 2.08 | 1.56 | - | 1.06 |
|  | 89 | - | - | - | - | 1.67 | - | 8.54 | 8.62 | - | 1.04 | 1.25 | 2.08 | 1.56 | - | 1.06 |
|  | 91 | - | - | - | 1.28 | - | - | - | - | - | 3.13 | 1.25 | 3.13 | 1.56 | 6.67 | 2.13 |
| *H*e |  | 0.758 | 0.723 | 0.765 | 0.789 | 0.773 | 0.760 | 0.797 | 0.724 | 0.688 | 0.735 | 0.804 | 0.728 | 0.689 | 0.806 | 0.756 |
| *H*o |  | 0.792 | 0.660 | 0.745 | 0.795 | 0.800 | 0.672 | 0.756 | 0.690 | 0.656 | 0.813 | 0.700 | 0.667 | 0.750 | 0.800 | 0.702 |
| *n* | 15 | 9 | 10 | 9 | 9 | 9 | 8 | 10 | 9 | 9 | 10 | 11 | 9 | 11 | 11 | 13 |
|  |  |  |  |  |  |  |  |  |  |  |  |  |  |  |  |  |
| *SaUD69* | 131 | - | - | **1.09** | - | - | - | - | - | - | - | - | - | - | - | - |
|  | 145 | 1.06 | 1.06 | - | - | - | 0.89 | - | - | - | 1.09 | - | 1.04 | - | - | - |
|  | 147 | 2.13 | - | 1.09 | 1.28 | 1.67 | - | 1.22 | 6.67 | - |  | 1.39 | - | - | - | - |
|  | 149 | 5.32 | 4.26 | 3.26 | 5.13 | 5.00 | 7.14 | 7.32 | 1.67 | - | 2.17 | - | 3.13 | 3.33 | - | 6.38 |
|  | 151 | 2.13 | 1.06 | 1.09 | 2.56 | - | 2.68 | 2.44 | - | 3.13 | 3.26 | 1.39 | 8.33 | 3.33 | - | 4.26 |
|  | 153 | 2.13 | 3.19 | 1.09 | 1.28 | 1.67 | 1.79 | 1.22 | 3.33 | 6.25 | 3.26 | 2.78 | 1.04 | 1.67 | 6.67 | 1.06 |
|  | 155 | 5.32 | 6.38 | 3.26 | 3.85 | 3.33 | 3.57 | 1.22 | - | 1.56 | - | 4.17 | 8.33 | - | 3.33 | 3.19 |
|  | 157 | 2.13 | 2.13 | 3.26 | 2.56 | 3.33 | - | 7.32 | 1.67 | 4.69 | 5.43 | - | 7.29 | 3.33 | 3.33 | 2.13 |
|  | 159 | 5.32 | 11.70 | 7.61 | 6.41 | 3.33 | 5.36 | 4.88 | 6.67 | 1.56 | 6.52 | 5.56 | 6.25 | 8.33 | 3.33 | 8.51 |
|  | 161 | 13.83 | 10.64 | 10.87 | 19.23 | 21.67 | 10.71 | 4.88 | 25.00 | 10.94 | 4.35 | 9.72 | 18.75 | 15.00 | 3.33 | 11.70 |
|  | 163 | 15.96 | 10.64 | 14.13 | 12.82 | 28.33 | 20.54 | 23.17 | 11.67 | 12.50 | 13.04 | 16.67 | 12.50 | 11.67 | 6.67 | 8.51 |
|  | 165 | 5.32 | 7.45 | 11.96 | 8.97 | 6.67 | 7.14 | 7.32 | 8.33 | 17.19 | 14.13 | 15.28 | 6.25 | 8.33 | 13.33 | 6.38 |
|  | 167 | 3.19 | 8.51 | 4.35 | 2.56 | 3.33 | 0.89 | 4.88 | - | 3.13 | 1.09 | - | 3.13 | 3.33 | 13.33 | 1.06 |
|  | 169 | 2.13 | 5.32 | 2.17 | 3.85 | 1.67 | 5.36 | - | 3.33 | - | 1.09 | 4.17 | 1.04 | - | 6.67 | 4.26 |
|  | 171 | 1.06 | 3.19 | 4.35 | 1.28 | - | 1.79 | 3.66 | 8.33 | 3.13 | 4.35 | - | 2.08 | 3.33 | 13.33 | - |
|  | 173 | - | 2.13 | - | - | - | 5.36 | 1.22 | 1.67 | 1.56 | - | - | 4.17 | 3.33 | 6.67 | 2.13 |
|  | 175 | 1.06 | 2.13 | 6.52 | 2.56 | 3.33 | 1.79 | - | 3.33 | 3.13 | 2.17 | 1.39 | 1.04 | 3.33 | - | - |
|  | 177 | 2.13 | 1.06 | 3.26 | 3.85 | 3.33 | 3.57 | 7.32 | 3.33 | 4.69 | 4.35 | 8.33 | 2.08 | 6.67 | - | 3.19 |
|  | 179 | 4.26 | 1.06 | 4.35 | - | 1.67 | 1.79 | 2.44 | - | 3.13 | - | 2.78 | - | 1.67 | 16.67 | 6.38 |
|  | 181 | 8.51 | 6.38 | 7.61 | 7.69 | 6.67 | 1.79 | 9.76 | 3.33 | 4.69 | 4.35 | 6.94 | 3.13 | 5.00 | - | 7.45 |
|  | 183 | 1.06 | - | 4.35 | 2.56 | 3.33 | 1.79 | 3.66 | 1.67 | 3.13 | 1.09 | 4.17 | 5.21 | 3.33 | 3.33 | 6.38 |
|  | 185 | 2.13 | 1.06 | - | 1.28 | - | 2.68 | 1.22 | - | 1.56 | 1.09 | 1.39 | - | - | - | 4.26 |
|  | 187 | 1.06 | 4.26 | 3.26 | 1.28 | 1.67 | 0.89 | 1.22 | 1.67 | 1.56 | 4.35 | 1.39 | - | 5.00 | - | 4.26 |
|  | 189 | 5.32 | 1.06 | - | 3.85 | - | 3.57 | - | 1.67 | 3.13 | 5.43 | 2.78 | 3.13 | - | - | 4.26 |
|  | 191 | 1.06 | 2.13 | 1.09 | - | - | 5.36 | 2.44 | 3.33 | 6.25 | - | 4.17 | 2.08 | 5.00 | - | 2.13 |
|  | 193 | 1.06 | 2.13 | - | 1.28 | - | - | 1.22 | - | - | 2.17 | 2.78 | - | - | - | - |
|  | 195 | 2.13 | - | - | 2.56 | - | - | - | - | 1.56 | - | 1.39 | - | - | - | - |
|  | 197 | 2.13 | - | - | - | - | - | - | - | - | - | - | - | 1.67 | - |  |
|  | 199 | - | - | - | 1.28 | - | 3.57 | - | 1.67 | - | 1.09 | - | - | - | - | 2.13 |
|  | 201 | - | - | - | - | - | - | - | 1.67 | 1.56 | 4.35 | - | - | - | - | - |
|  | 203 | - | 1.06 | - | - | - | - | - | - | - | 5.43 | 1.39 | - | 3.33 | - | - |
|  | 205 | - | - | - | - | - | - | - | - | - | **4.35** | - | - | - | - | - |
|  | 207 | **1.06** | - | - | - | - | - | - | - | - | - | - | - | - | - | - |
| *H*e |  | 0.936 | 0.941 | 0.934 | 0.927 | 0.867 | 0.924 | 0.914 | 0.907 | 0.935 | 0.943 | 0.926 | 0.922 | 0.943 | **0.926** | 0.947 |
| *H*o |  | 0.957 | 0.915 | 0.913 | 0.897 | 0.867 | 0.875 | 0.902 | 0.900 | 0.844 | 0.913 | 0.778 | 0.854 | 0.900 | **0.600** | 0.957 |
| *n* | 33 | 27 | 24 | 21 | 23 | 17 | 23 | 21 | 20 | 22 | 24 | 21 | 20 | 20 | 13 | 21 |
|  |  |  |  |  |  |  |  |  |  |  |  |  |  |  |  |  |
| *SaGT1* | 93 | - | - | - | - | - | - | - | - | - | - | - | - | - | - | **1.04** |
|  | 117 | 1.09 | - | - | - | 1.61 | - | - | - | - | 1.09 | - | - | - | - | - |
|  | 119 | - | 2.17 | 1.06 | - | 1.61 | - | - | - | - | - | - | - | - | - | - |
|  | 121 | 3.26 | 3.26 | 4.26 | 6.76 | 3.23 | 3.28 | 8.33 | 5.00 | 4.69 | 3.26 | 1.28 | 4.17 | 1.56 | - | 1.04 |
|  | 123 | 7.61 | 3.26 | 4.26 | 6.76 | 3.23 | 9.84 | 2.38 | 10.00 | 10.94 | 7.61 | 5.13 | 10.42 | 10.94 | 4.35 | 3.13 |
|  | 125 | 4.35 | 6.52 | 7.45 | 2.70 | 6.45 | 2.46 | 7.14 | - | 4.69 | 2.17 | 3.85 | 4.17 | 3.13 | 2.17 | 3.13 |
|  | 127 | 3.26 | 6.52 | 6.38 | 5.41 | 1.61 | 4.92 | 7.14 | 6.67 | 1.56 | 9.78 | 2.56 | 4.17 | 6.25 | 6.52 | 6.25 |
|  | 129 | 8.70 | - | 3.19 | - | 8.06 | 3.28 | 1.19 | 3.33 | 3.13 | 7.61 | 8.97 | 7.29 | 12.50 | 13.04 | 6.25 |
|  | 131 | 1.09 | 4.35 | 3.19 | 2.70 | 3.23 | 0.82 | 4.76 | - | 1.56 | - | 2.56 | 3.13 | 3.13 | - | 2.08 |
|  | 133 | 7.61 | 6.52 | 2.13 | 2.70 | 1.61 | 9.02 | 8.33 | 3.33 | 7.81 | 5.43 | 2.56 | 2.08 | 4.69 | 6.52 | 7.29 |
|  | 135 | 5.43 | 7.61 | 4.26 | 8.11 | 6.45 | 0.82 | 3.57 | 1.67 | 1.56 | 5.43 | 3.85 | 5.21 | 1.56 | 2.17 | 5.21 |
|  | 137 | 4.35 | 4.35 | 7.45 | 4.05 | 8.06 | 9.02 | 1.19 | 10.00 | 6.25 | 8.70 | 7.69 | 4.17 | 6.25 | 13.04 | 5.21 |
|  | 139 | 4.35 | 3.26 | 4.26 | 10.81 | 4.84 | 2.46 | 7.14 | 6.67 | 4.69 | 8.70 | 2.56 | 5.21 | 6.25 | 13.04 | 5.21 |
|  | 141 | 2.17 | 2.17 | 6.38 | 10.81 | 3.23 | 5.74 | 3.57 | 3.33 | 3.13 | 2.17 | 3.85 | 3.13 | 3.13 | 4.35 | 2.08 |
|  | 143 | 6.52 | 1.09 | - | 2.70 | 4.84 | 2.46 | 3.57 | 1.67 | 3.13 | - | 1.28 | 5.21 | 3.13 | 2.17 | 3.13 |
|  | 145 | 1.09 | 3.26 | - | 1.35 | 4.84 | 2.46 | 1.19 | 5.00 | 1.56 | 3.26 | 5.13 | 2.08 | 3.13 | 2.17 | 4.17 |
|  | 147 | 14.13 | 5.43 | 7.45 | 4.05 | 3.23 | 4.10 | 3.57 | 3.33 | 4.69 | 5.43 | 10.26 | 7.29 | 6.25 | 8.70 | 8.33 |
|  | 149 | 5.43 | 11.96 | 5.32 | 5.41 | 6.45 | 4.10 | 7.14 | 8.33 | 1.56 | 9.78 | 7.69 | 6.25 | 9.38 | 4.35 | 5.21 |
|  | 151 | 3.26 | 4.35 | 14.89 | 6.76 | 9.68 | 8.20 | 14.29 | 13.33 | 12.50 | 5.43 | 5.13 | 6.25 | 3.13 | 6.52 | 7.29 |
|  | 153 | 1.09 | 4.35 | 1.06 | 2.70 | 1.61 | 1.64 | 2.38 | 5.00 | 6.25 | 4.35 | 3.85 | 1.04 | 3.13 | - | 4.17 |
|  | 155 | 1.09 | 3.26 | 5.32 | 4.05 | 12.90 | 7.38 | 2.38 | 1.67 | 3.13 | - | 2.56 | 4.17 | 4.69 | 2.17 | 6.25 |
|  | 157 | 3.26 | 5.43 | 2.13 | 1.35 | - | 4.10 | - | 5.00 | 4.69 | - | 3.85 | 1.04 | 1.56 | 4.35 | 2.08 |
|  | 159 | - | - | 4.26 | 5.41 | 1.61 | 0.82 | 1.19 | - | 1.56 | 2.17 | 3.85 | 1.04 | - | - | 2.08 |
|  | 161 | 2.17 | 3.26 | - | 1.35 | 1.61 | - | 4.76 | - | - | 2.17 | - | - | - | - | - |
|  | 163 | - | - | 1.06 | - | - | - | - | - | 3.13 | - | 2.56 | 3.13 | 1.56 | - | 2.08 |
|  | 165 | 3.26 | 4.35 | 2.13 | - | - | 3.28 | - | - | - | - | - | 2.08 | - | 2.17 | - |
|  | 167 | - | - | - | - | - | 2.46 | 1.19 | - | - | - | - | 1.04 | - | - | - |
|  | 169 | - | - | - | - | - | - | - | - | - | **1.09** | - | - | - | - | - |
|  | 171 | - | 2.17 | - | - | - | - | - | - | - | 1.09 | 2.56 | - | - | - | 2.08 |
|  | 173 | - | - | - | - | - | - | 1.19 | - | - | 1.09 | 3.85 | 1.04 | - | - | 2.08 |
|  | 175 | 1.09 | - | 1.06 | 1.35 | - | 1.64 | - | 1.67 | 3.13 | 1.09 | - | 1.04 | - | - |  |
|  | 177 | 3.26 | 1.09 | 1.06 | 1.35 | - | 1.64 | 2.38 | - | - | - | 1.28 | 2.08 | 1.56 | - | 1.04 |
|  | 179 | - | - | - | - | - | 1.64 | - | - | - | 1.09 | - | - | - | - | 1.04 |
|  | 181 | 1.09 | - | - | 1.35 |  |  | - | - | 1.56 | - | 1.28 | 1.04 | - | - | 1.04 |
|  | 183 | - | - | - | - | - | 2.46 | - | 1.67 | - | - | - | 1.04 | 1.56 | - | - |
|  | 185 | - | - | - | - | - | - | - | 1.67 | 3.13 | - | - | - | 1.56 | 2.17 | - |
|  | 193 | - | - | - | - | - | - | - | **1.67** | - | - | - | - | - | - | - |
| *H*e |  | 0.933 | 0.940 | 0.930 | 0.934 | 0.930 | 0.941 | 0.928 | 0.925 | 0.935 | 0.932 | 0.943 | 0.945 | 0.931 | 0.912 | 0.947 |
| *H*o |  | 0.913 | 0.978 | 0.957 | 0.946 | 0.968 | 0.918 | 0.952 | 0.900 | 0.906 | 0.891 | 0.974 | 0.958 | 0.969 | 0.913 | 0.938 |
| *n* | 37 | 25 | 23 | 23 | 23 | 22 | 26 | 23 | 21 | 24 | 23 | 25 | 28 | 23 | 18 | 27 |
|  |  |  |  |  |  |  |  |  |  |  |  |  |  |  |  |  |
| *SaGT26* | 203 | - | - | - | - | - | - | - | 1.67 | 1.56 | - | 1.28 | - | - | - | - |
|  | 213 | 1.04 | - | - | - | - | 1.61 | 3.57 |  | 1.56 | 2.08 | - | 1.06 | - | - | 1.04 |
|  | 215 | - | 1.14 | 2.08 | - | - | - | - | - | 1.56 | 1.04 | - | 3.19 | - | 4.17 | 1.04 |
|  | 217 | 5.21 | - | 4.17 | - | 1.72 | - | 3.57 | 3.33 | 7.81 | 4.17 | - | 1.06 | 6.25 | - | 4.17 |
|  | 219 | 34.38 | 6.82 | 2.08 | 21.62 | 27.59 | 20.16 | 26.19 | 6.67 | 12.50 | 16.67 | 11.54 | 20.21 | 39.06 | 6.25 | 22.92 |
|  | 221 | 9.38 | 26.14 | 26.04 | 17.57 | 13.79 | 21.77 | 8.33 | 25.00 | 18.75 | 14.58 | 21.79 | 18.09 | 9.38 | 16.67 | 9.38 |
|  | 223 | 1.04 | 3.41 | 3.13 | 4.05 | 1.72 | 1.61 | - | 16.67 | - | 1.04 | 6.41 | 4.26 | - | 6.25 | 1.04 |
|  | 225 | - | - | 1.04 | - | - | 2.42 | - | 1.67 | - | 1.04 | - | - | - | 8.33 | - |
|  | 227 | - | - | 1.04 | - | 1.72 | - | - | - | - | - | - | - | - | 4.17 | - |
|  | 229 | - | - | 2.08 | - | - | 1.61 | - | - | - | - | 1.28 | - | - | - | 1.04 |
|  | 231 | 8.33 | 20.45 | 8.33 | 20.27 | 10.34 | 5.65 | 7.14 | 11.67 | 14.06 | 15.63 | 10.26 | 9.57 | 9.38 | 8.33 | 16.67 |
|  | 233 | - | 2.27 | 13.54 | - | 3.45 | 1.61 | 2.38 | 1.67 | 1.56 | 5.21 | 7.69 | 4.26 | 3.13 | 8.33 | 2.08 |
|  | 235 | 2.08 | 6.82 | 2.08 | 6.76 | 5.17 | 2.42 | 3.57 | 1.67 | 4.69 | 4.17 | 2.56 | 4.26 | 7.81 | 6.25 | 1.04 |
|  | 237 | 8.33 | 3.41 | 1.04 | - | 3.45 | 3.23 | 13.10 | 5.00 | - | 13.54 | 1.28 | 1.06 | - | 6.25 | 2.08 |
|  | 239 | 11.46 | 11.36 | 10.42 | 5.41 | 12.07 | 16.94 | 21.43 | 11.67 | 9.38 | 6.25 | 7.69 | 12.77 | 10.94 | 20.83 | 11.46 |
|  | 241 | 3.13 | 6.82 | 4.17 | 16.22 | 5.17 | 6.45 | - | 5.00 | 15.63 | 6.25 | 11.54 | 3.19 | 7.81 | 2.08 | 8.33 |
|  | 243 | 3.13 | 2.27 | 7.29 | 4.05 | 6.90 | 5.65 | 1.19 | 3.33 | 7.81 | 3.13 | 5.13 | 8.51 | 3.13 | - | 7.29 |
|  | 245 | 2.08 | 5.68 | 4.17 | - | 1.72 | 4.03 | 4.76 | - | - | 2.08 | 5.13 | 2.13 | 1.56 | - | 3.13 |
|  | 247 | - | - | 2.08 | - | 1.72 | 0.81 | - | 3.33 | - | 2.08 | 1.28 | 2.13 | - | 2.08 | 2.08 |
|  | 249 | - | - | 2.08 | - | - | 1.61 | - | - | - | 1.04 | - | - | - | - | 2.08 |
|  | 251 | - | 3.41 | 1.04 | - | - | - | - | 1.67 | 3.13 | - | 3.85 | 2.13 | - | - | 2.08 |
|  | 253 | - | - | - | - | **3.45** | - | - | - | - | - | - | - | - | - | - |
|  | 255 | - | - | 2.08 | 2.70 | - | - | 4.76 | - | - | - | - | - | - | - | - |
|  | 257 | 10.42 | - | - | - | - | 0.81 | - | - | - | - | 1.28 | 1.06 | 1.56 | - | 1.04 |
|  | 259 | - | - | - | 1.35 | - | - | - | - | - | - | - | 1.06 | - | - | - |
|  | 261 | - | - | - | - | - | **1.61** | - | - | - | - | - | - | - | - | - |
| *H*e |  | 0.815 | 0.841 | 0.872 | 0.824 | 0.853 | 0.854 | 0.831 | 0.856 | 0.868 | 0.882 | 0.882 | 0.874 | 0.783 | 0.878 | 0.869 |
| *H*o |  | 0.854 | 0.773 | 0.833 | 0.811 | 0.862 | 0.823 | 0.833 | 0.867 | 0.875 | 0.875 | 0.769 | 0.830 | 0.781 | 0.792 | 0.896 |
| *n* | 26 | 13 | 13 | 20 | 10 | 15 | 18 | 12 | 15 | 13 | 17 | 16 | 18 | 11 | 13 | 19 |
|  |  |  |  |  |  |  |  |  |  |  |  |  |  |  |  |  |
| *SaGT31* | 239 | - | - | - | - | - | - | - | - | - | **4.17** | - | - | - | - | - |
|  | 241 | 22.34 | 22.34 | 26.04 | 28.21 | 20.00 | 27.05 | 33.33 | 31.03 | 32.81 | 31.25 | 36.25 | 29.17 | 40.32 | 36.36 | 28.13 |
|  | 243 | 53.19 | 65.96 | 53.13 | 55.13 | 60.00 | 53.28 | 51.19 | 60.34 | 54.69 | 51.04 | 55.00 | 46.88 | 53.23 | 43.18 | 60.42 |
|  | 245 | 17.02 | 8.51 | 15.63 | 8.97 | 10.00 | 13.11 | 8.33 | 3.45 | 7.81 | 11.46 | 5.00 | 16.67 | 4.84 | 6.82 | 6.25 |
|  | 247 | 4.26 | 3.19 | 5.21 | 7.69 | 10.00 | 6.56 | 7.14 | 3.45 | 4.69 | 2.08 | 3.75 | 7.29 | 1.61 | 13.64 | 5.21 |
|  | 249 | 1.06 | - | - | - | - | - | - | 1.72 | - | - | - | - | - | - | - |
|  | 251 | **2.13** | - | - | - | - | - | - | - | - | - | - | - | - | - | - |
| *H*e |  | 0.587 | 0.455 | 0.565 | 0.543 | 0.535 | 0.564 | 0.548 | 0.464 | 0.514 | 0.565 | 0.479 | 0.604 | 0.457 | 0.594 | 0.486 |
| *H*o |  | 0.617 | 0.532 | 0.729 | 0.692 | 0.567 | 0.590 | 0.714 | 0.379 | 0.500 | 0.625 | 0.500 | 0.729 | 0.742 | 0.545 | 0.604 |
| *n* | 7 | 6 | 4 | 4 | 4 | 4 | 4 | 4 | 5 | 4 | 5 | 4 | 4 | 4 | 4 | 4 |
|  |  |  |  |  |  |  |  |  |  |  |  |  |  |  |  |  |
| *SaGT32* | 124 | - | **1.04** | - | - | - | - | - | - | - | - | - | - | - | - | - |
|  | 136 | - | **1.04** | - | - | - | - | - | - | - | - | - | - | - | - | - |
|  | 142 | - | **1.04** | - | - | - | - | - | - | - | - | - | - | - | - | - |
|  | 144 | - | - | - | - | - | 0.83 | - | 1.72 | 1.56 | 2.08 | - | 2.13 | 1.61 | - | 2.33 |
|  | 146 | 1.04 | 1.04 | - | - | 1.61 | - | 4.76 | - | - | - | - | - | - | - | - |
|  | 148 | 4.17 | - | 2.13 | 1.39 | 4.84 | - | - | - | - | - | 6.25 | 2.13 | - | - | - |
|  | 150 | 1.04 | 1.04 | 2.13 | 1.39 | - | 1.67 | - | - | - | 2.08 | 1.25 | 1.06 | 4.84 | 2.17 | 4.65 |
|  | 152 | 2.08 | 3.13 | - | 2.78 | 8.06 | 5.83 | 1.19 | 3.45 | 6.25 | 9.38 | 3.75 | 2.13 | 3.23 | 4.35 | 2.33 |
|  | 154 | 15.63 | 11.46 | 9.57 | 13.89 | 4.84 | 17.50 | 9.52 | 10.34 | 14.06 | 5.21 | 11.25 | 13.83 | 16.13 | 15.22 | 5.81 |
|  | 156 | 2.08 | 1.04 | 5.32 | - | 6.45 | 5.00 | 3.57 | - | - | 5.21 | 2.50 | 1.06 | 3.23 | 4.35 | 3.49 |
|  | 158 | 17.71 | 7.29 | 18.09 | 12.50 | 14.52 | 6.67 | 13.10 | 17.24 | 7.81 | 12.50 | 17.50 | 10.64 | 6.45 | 21.74 | 4.65 |
|  | 160 | 6.25 | 13.54 | 8.51 | 15.28 | 3.23 | 14.17 | 8.33 | 13.79 | 4.69 | 10.42 | 3.75 | 12.77 | 4.84 | 2.17 | 8.14 |
|  | 162 | 7.29 | 8.33 | 7.45 | 4.17 | 4.84 | 5.83 | 4.76 | 5.17 | 4.69 | 5.21 | 3.75 | 3.19 | 8.06 | 4.35 | 6.98 |
|  | 164 | - | 2.08 | 1.06 | 4.17 | 1.61 | 5.00 | 5.95 | 3.45 | 3.13 | 7.29 | 2.50 | 2.13 | 1.61 | 2.17 | 1.16 |
|  | 166 | - | 6.25 | 2.13 | 1.39 | 6.45 | 3.33 | 20.24 | 12.07 | 7.81 | 7.29 | 2.50 | 6.38 | 6.45 | 4.35 | 10.47 |
|  | 168 | 6.25 | 8.33 | 6.38 | 6.94 | 17.74 | 10.83 | 7.14 | 3.45 | 6.25 | 2.08 | 10.00 | 8.51 | 1.61 | 6.52 |  |
|  | 170 | 4.17 | 7.29 | 8.51 | 9.72 | 11.29 | 5.83 | 8.33 | 6.90 | 10.94 | 14.58 | 8.75 | 8.51 | 11.29 | 2.17 | 12.79 |
|  | 172 | 10.42 | 11.46 | 13.83 | 11.11 | 14.52 | 10.00 | 2.38 | 6.90 | 15.63 | 8.33 | 7.50 | 9.57 | 8.06 | 10.87 | 15.12 |
|  | 174 | 8.33 | 11.46 | 5.32 | 15.28 | - | 5.00 | 5.95 | 8.62 | 14.06 | 7.29 | 12.50 | 10.64 | 11.29 | 13.04 | 12.79 |
|  | 176 | 8.33 | 3.13 | 3.19 | - | - | 0.83 | 1.19 | 1.72 | 3.13 | - | 3.75 | 2.13 | 6.45 | 4.35 | 3.49 |
|  | 178 | 2.08 | - | 3.19 | - | - | 1.67 | 3.57 | 1.72 | - | - | 1.25 | 2.13 | 4.84 | - | 4.65 |
|  | 180 | 2.08 | - | 2.13 | - | - | - | - | - | - | 1.04 | 1.25 | 1.06 | - | - | 1.16 |
|  | 182 | - | - | - | - | - | - | - | **3.45** | - | - | - | - | - | - | - |
|  | 184 | 1.04 | - | 1.06 | - | - | - | - | - | - | - | - | - | - | 2.17 | - |
| *H*e |  | 0.893 | 0.904 | 0.898 | 0.876 | 0.880 | 0.896 | **0.891** | 0.893 | 0.889 | 0.904 | 0.899 | 0.903 | 0.907 | 0.875 | 0.901 |
| *H*o |  | 0.833 | 0.896 | 0.851 | 0.861 | 0.935 | 0.833 | **0.881** | 0.966 | 0.969 | 0.958 | 0.900 | 0.957 | 0.871 | 0.913 | 0.860 |
| *n* | 24 | 16 | 18 | 16 | 13 | 13 | 16 | 15 | 15 | 13 | 15 | 17 | 18 | 16 | 15 | 16 |
|  |  |  |  |  |  |  |  |  |  |  |  |  |  |  |  |  |
| *H*e overall |  | 0.847 | 0.843 | 0.855 | 0.850 | 0.838 | 0.857 | 0.849 | 0.844 | 0.848 | 0.861 | 0.864 | 0.858 | 0.842 | 0.852 | 0.850 |
| *H*o overall |  | 0.847 | 0.835 | 0.849 | 0.852 | 0.857 | 0.822 | 0.834 | 0.813 | 0.825 | 0.855 | 0.814 | 0.856 | 0.861 | 0.826 | 0.840 |
| NPA |  | 2 | 3 | 1 | 1 | 1 | 5 | 1 | 2 | 1 | 5 | 1 | 1 | 0 | 0 | 1 |
| PPA |  | 0.20 | 0.30 | 0.10 | 0.10 | 0.10 | 0.50 | 0.10 | 0.20 | 0.10 | 0.50 | 0.10 | 0.10 | 0.00 | 0.00 | 0.10 |
| MNA |  | 15.4 | 15.7 | 16.0 | 14.3 | 13.4 | 16.0 | 14.1 | 13.8 | 14.1 | 16.1 | 15.3 | 16.0 | 14.3 | 11.9 | 16.5 |
